# Supplementary material for: Evidence for a composite anterior determinant in the hover flyEpisyrphus balteatus(Syrphidae), a cyclorrhaphan fly with an anterodorsal serosa anlage
Source: Oxford University Press journal article supplement (doi:10.1242/dev.030270), 2008-12-07
Supplement: dev030270-sup-030270-figs2.pdf [file dev030270-sup-030270-figs2.pdf]

| Trees                                                                                                                   | $-\ln[L]$          | $\Delta\ln[L]$        | AU               | SH               | RELL BP          |
|-------------------------------------------------------------------------------------------------------------------------|--------------------|-----------------------|------------------|------------------|------------------|
| 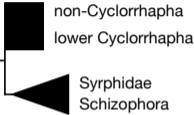 non-Cyclorrhapha<br>lower Cyclorrhapha | 65,893.5<br>CAD nt | <b>best</b><br>CAD nt | 1.000<br>CAD nt  | 1.000<br>CAD nt  | 1.000<br>CAD nt  |
|                                                                                                                         | 10,870.6<br>CAD RY | <b>best</b><br>CAD RY | 0.999<br>CAD RY  | 0.994<br>CAD RY  | 0.999<br>CAD RY  |
|                                                                                                                         | 7,385.1<br>28S nt  | <b>best</b><br>28S nt | 0.999<br>28S nt  | 0.995<br>28S nt  | 0.999<br>28S nt  |
|                                                                                                                         | 3,165.9<br>28S RY  | <b>best</b><br>28S RY | 0.981<br>28S RY  | 0.964<br>28S RY  | 0.978<br>28S RY  |
|  non-Cyclorrhapha                       | 65,990.4<br>CAD nt | 96.9<br>CAD nt        | 0.000*<br>CAD nt | 0.000*<br>CAD nt | 0.000*<br>CAD nt |
|                                                                                                                         | 10,895.7<br>CAD RY | 25.1<br>CAD RY        | 0.001*<br>CAD RY | 0.006*<br>CAD RY | 0.001*<br>CAD RY |
|                                                                                                                         | 7,420.0<br>28S nt  | 34.9<br>28S nt        | 0.001*<br>28S nt | 0.005*<br>28S nt | 0.001*<br>28S nt |
|                                                                                                                         | 3,185.2<br>28S RY  | 19.4<br>28S RY        | 0.019*<br>28S RY | 0.036*<br>28S RY | 0.022*<br>28S RY |
