# Supplementary material for: Evidence for a composite anterior determinant in the hover flyEpisyrphus balteatus(Syrphidae), a cyclorrhaphan fly with an anterodorsal serosa anlage
Source: Oxford University Press journal article supplement (doi:10.1242/dev.030270), 2008-12-07
Supplement: dev030270-sup-030270-figs3.pdf [file dev030270-sup-030270-figs3.pdf]

# Nanos

Csa MALKTTKYNALNSPKNSYYFPAQLDSEIDNHLTGSYSSSSSTSGFISPKLSEAS--F---DNFSKFENKRGSDKNDLSSCFDSFNLDEKSTVLAKHWNIPENSFDWEQSINALFDP 110  
Ast MAESRCK-----TKQNDSAIMTSAL-----ESAIK 25  
Aae ME-----NVNSYYF---LAPAIAK-----SFNSSGDSFESDPSLI-----YSSSSSDVDNLTATFQELVIDVNGMV----- 59  
Aga MEVTKQN-----ASNNTTEEALWKLILAPYGWDEQMNEAARE 37  
Eba M-----YPDDM---YRNNVENN-----NENFGTFY-----GMN-CRQEYLEDTSTI----- 39  
Dme M-----F-----RSNLEGS-GAAAVGVANPPSLAQSGKIFQLQDNFSAFHARGGLNILGL----QDMYLDTSGANSSATLSPPITPVTPDPSTSA---- 81

Csa SSKQFIDFENFVQSSHGFSDCSL----FSYSPL-----SSLESISNDQNYND-----LYSDDLTYRMQQ-----ECIRREFEMNGKNVDEES--FY--- 186  
Ast FLQRYPELTQFVVN-----KSSYQFDI-----HSLIVDAKKMNL-AEA-----VEDIRKEFATNGSSSEFC----- 82  
Aae -----RE-----LFEKNTDLHRDT-----DSIRQDFIRNG----- 84  
Aga FLKNYSDFIPMLIG-----QSHYKIDL-----RSIIKEARANKWRNTT-----LDEICADFANGTTCEL-E----- 94  
Eba -----KEEDEISRSLKMFAMLTAYKTEPTQSNYQVDAIMQEFACNGFSCDEL---RY--- 88  
Dme QSTHF----PFLADSAATANSLLMQRQYHYHLLLQOQQQLAMAQHQLALAASAAAAASASHQQTDEIARSLKIFAQVTTGAAENAAGS--MQDVMQEFATNGYASDDLGRMSYGSA 189

Csa PLAMSTPFVERKSDQYKFNYSNREPTKVEFEPTKVFPSKQHQSALSIV---PFQPYNNITENIQFDSIYPPPYLVPSVFPDNKAGNKINGRKRGHQNSHGVLQNLQPMI--- 294  
Ast -----ENQGSLEHSVSIDPI-----KQNRQSEDALLTE-----DESTRVEEPANESAECNVLQ----- 130  
Aae -----IDSSMTECLSSRRLPPPGLGIVISKWPLSMCDNESS-----ATNPNGTKTDDSERKRNKGA----- 140  
Aga -----EEEVDLQA-----KHAPEMDGSELME-----AVDVAAELKNM-----VLQ----- 129  
Eba -----QRCNNNETTNNPDGVR-----NNVWKPKT----- 112  
Dme PPQVQMPQOQHQQOQLHLPLGRNPAQLQTNGGNLMP-----IPLATHW-LNNYRE-----HLNNVWRNMSYIPAAP-----NTMGLQAQTAATVSTNLGVGMGL 279

Csa -----NTNNSNYKFGAANEKMKDKNSIKKKKMD---DHCVFCKNNGADEILYKSHTVKDLKGRVLCPKLRAYQCPICGADGDQSHTVKYCPKKPIVMTMEDLKKLDAS 393  
Ast -----DITNHTKDRPR-RNLRK---NGSHPKHCVFCHNNGATREEYESHCKDEWGNVTCVPLQNFVCSRCNATGTNAHTAKYCPQKPIITPEDCVAIEKR 221  
Aae -----FQSSRRKR-----SKENE---DYCVFCYNNREEQETYLGHSCRDGEGFVVCVKLQRYVCPYQATGHLAHTKKYCPKKPIITPDDLRSMTVP 223  
Aga -----DISNQPKQSTTRPLRKRKNKSTCELDHCVFCFNKADREVEYESHCKDEAGNVTCPVLQTFVCMRCKATGTAHTAKYCPKPKPIITPEDCLAMELR 225  
Eba -----TNIAEYN---RKQPK--KRYNNNIKSGRYSVPRHCVFCENNNQPHAVVKSHNVRDIHDKVLCPKLRTYICPICATGDNAHTVKYCPQKPIITMEDAIKAE-S 208  
Dme GLPVQGEQLRGASNSSNNN---NNNNKVYKRYNSKAKEIS---RHCVFCENNNEPEAVINSHSVRDNFNRVLCPKLRTYVCPICGASGDSAHTIKYCPKKPIITMEDAIKAE-S 386

Csa -----KMINGYASTRF 404  
Ast WQQRRRRL--VQETIGANGQSKPIVETKATSRI RL 255  
Aae FDGP-----ANTSGRNRSVGRGKSLRF 246  
Aga RHKIHRKGVCTASEINLSAGSSSAIVHTK-KRLVRL 260  
Eba F-----RLSKSSYFKHHMKA 223  
Dme F-----RLAKSSYYKQOMKV 401

# Caudal

Aga MVS-YYNHFAMYPKNHSGNLPYSATTG--W-YPSNYQHQP--HPOFIGDGESSPOPA-----MYYPHPHVHFHPQ---SSPDWSSHENFSTPPQTSGLGSHG-----PSPGA-- 94  
Eli MVS-YYNSLSYSQKHSAPNLTYP SAPHQPW-FPTNYHPAAAANNQFLSSMDPQHH-----QPMYY-NPHMFH-QTAAAADLYAARENFSNLSAGPLTAHSQMFSTLPHNQQQQ 104  
Llu MVSSFYNTQPY SQKHHGINLPYS--TAQPW-FTSSYHPHP--NHQFLGD-DSPH---HHPQ--HMYYPSPHMFHQT---SAGDWHVPENYPNTAQAHM-LQ----- 88  
Mab MVS GYYNPLQY-QKHTSA---YP--PGN-W-FPPANYATPH-POQFLNDVHEQH---QAA--LTYYNQT-MF-----PPGDWHAPDTMQSPPTSHH-GSS-----HHM 82  
Eba MVS-YYNSLSYSQKHSAAANLPYP--AGQPWAWQSNYHP-PP-NHQFLGDVDSPHSVGHHP--Q-YYN--HMFGNH---PSADWHTTENFQNTAQSHL-LQH-----QHQ 91  
Dme MVSHYYNTLPY TQKHSAAANLAYASAAGQPWNWTPNYHHTPP--NHQFLGDVDS SHAAHAAAAHQMYYN SHHMFHSAAAAASAGEWHSP---ASSTADNF-VQNV-----PTSAHQ 105

Aga -----GGTGGGGGGGGGGIGSGALHLGQNP NLHHHHHHHHGNNGGGNGGGGGSGNAHD-HLADGL-HSIPSPPI TVSGSDMSSPG-APTGSSSPQI----- 185  
Eli QQQQQQQQQQQQQNGS-----HQNHQQCNHQNVGHGSGTGNN SPLDETSSADLLTDGI PSPAIT----NLNNGGGGAGGGGGGGSEISSP----- 187  
Llu -----QHNNVAG-----GNTQLNDSTSSSTGENNNNNNNN-----NNNTAHIAEGL---PSPPI TVSGSEISSPG-APASSSPHPLTNIN----- 159  
Mab LYQ-----SPATN-----SQTQLNETTSSNGDSNHNS-----HPTPNLTEAL---PSPPI TVSGSELSSPGAPVAASSPNGNIGSH----- 152  
Eba QHQQQQHQQHHQHQS-----GATQLNDSASSVGE-----PQIADGL---PSPPI TVSGSEISSPG-APASSSPHANMSTN----- 159  
Dme MQQH HHHHAHASSSSASSGSSSSGGAPGAPQLNETNSSIGVGGAGGGGGVGGATDGGPGSAPPNHQQHIAEGL---PSPPI TVSGSEISSPG-APTSASSPHHHLAHL SAVAN 215

Aga -----TPRPTPVKSPY--EWMKKQSYQS QPNPGKTRTKDKYRVVYTDQRLELEKEFYTRYITIRRKAELAQNQLSERQVKIWFQNRRAKD 270  
Eli -----GIPNASSSPQISVNGQQQQQRPTPCNSPYRYDWMKKPAYASQPNPGKTRTKDKYRVVYTDQRLELEKEYHTSRYITIRRKT ELAQGLQLSERQVKIWFQNRRAKE 292  
Llu -GNHTNSNNNNNSNN-----NNNNHRTSPVKSPY-YEWMKKPSYPTOPTPGKTRTKDKYRVVYTDYQRLELEKEYCTSRITIRRKT ELAQLQLSERQVKIWFQNRRAKE 263  
Mab -GRASPST-----KNVY-YDWMKKPSYPAOPTPGKTRTKDKYRVVYSDQRLELEKEYCTARYITIRRKS ELATSLQLSERQVKIWFQNRRAKE 239  
Eba -SNNNNNNSTTNNNNTSGNSTTINNTIRSSPVKSPY-YDWMKKQSYTAOPTPGKTRTKDKYRVVYTDQRLELEKEYCTSRITIRRKT ELAQLQLSERQVKIWFQNRRAKE 271  
Dme NNNNNNNNSPSTHNNNNNNNSVSNNN-RTSPSKPPY-FDWMKKPAYPAQOPQPGKTRTKDKYRVVYTDQRLELEKEYCTSRITIRRKS ELAQLTSLSERQVKIWFQNRRAKE 328

## Homeodomain

Aga RKQKKAETGSVG-----GGMGGLGGGQSLVAHAHQGNHPHGAAQSMSALLADTKPKLEPSLHLSH-----LHQ--MSAMSMGMSMGLHHHPGHHAALHAHLG 364  
Eli RKQTKKRDDSSSSINSSNGCIGQNGGVSGVGGGIS-----SATADDLVNFM-EPKPKLESGLH--HHL SHQHSFHHHQMMAATGMSPSMSGLQ---ALHHHHHGH LA 388  
Llu RKQNKRRDDP-----L--IGQNP-----LSNYM-DTKPKIEPSLH---L--QHSLHQ---MG-MSMSP-SFAIHH---LHQGHPLL- 326  
Mab RKQKRRDDP-----VPMMG-----ADYM-DTKPKIEPGAH---HL--LHQMQM-----HMAM-P-PMGLHHHG----- 291  
Eba RKQNKRRDDP-----MSAVVQHSD-----LASYM-DTKPKIEPLH---HL--QHSLHP---MSSMAMNM-PMSLHHHHSVLHHGHHP LA- 342  
Dme RKQNKKGSDPNV-----MGVGVQHAD-----YSQLL-DAKAKLEPLHLSHSL--AHSMPN---MAAMNI-P-AMRLEPH---LAAHSHSLAA 400

Aga VPTSQHH-----QLNQAAVAAAAASQVPSTSLSI-----M 394  
Eli AVAAAASGNSSTTQSQHMQH VYQOM-----TGIETIS 420  
Llu --PPPQHLHQSHAHTHS---HSHSHPQSHSHSQMSSSPNGVIGSGVGVGALSM 376  
Mab -----LHHPHAHTHALLOQSQHNLHPHISOMP GS-----VPTPPM 326  
Eba VPPAPQHLHQTHSQ-----MSAAAAASV GALSM 369  
Dme VAAHSHQLQQQS-----AOMSA-----AAAVGTLSM 427

# Orthodenticle

|             |                                                                                                                     |     |
|-------------|---------------------------------------------------------------------------------------------------------------------|-----|
| Tca-1       | MWPPEAVHSLERFCYGNVNYRQRSSQPLKISCLKTPPPPEEDNRGCAASVGGESFYLPNMNQGFVKQQTAPHGPPYAPHPSLSSGLGGG-LSGMPMPALG-FGLG-HPLES--V  | 110 |
| Tca-2       | MWS-----NSLTAGC-----NPDSE-----LFP--GF--GSTCGSSSSSMAYLKSAP-----YPVPLGLHLGLPVDLSLHSSMA                                | 59  |
| Nvi-1       | MAAAGAPNSV-----VGSQYHHQAVSHHPS-----HSAAAHHQIGMGPHPHGPSH--HPGLSGPFLTSHPHF-----HGHPDLAHMV                             | 71  |
| Nvi-2       | MWP-----NSLGGG-----AGCGGASAAAAALKTSP-----Y-VGALGMP--PIEALHSSI-                                                      | 44  |
| Eba         | MAA-----GFLKSGD-----LGPHPHSY-----GGPHPHSVPHGPLPPGM-----PMPSLGPFGLP-HGLEA--V                                         | 53  |
| Dme         | MAA-----GFLKSGD-----LGPHPHSY-----GGPHPHSVPHGPLPPGM-----PMPSLGPFGLP-HGLEA--V                                         | 53  |
| Homeodomain |                                                                                                                     |     |
| Tca-1       | P-FPQVYSYFAGVNPQRKRRERTTFTRAQLDLLEGLFAKTRYPDIFMREEVAVKINLPESRVQVWFKNRRAKCRQQLQQQQ-----                              | 191 |
| Tca-2       | G-YP-----AGNQKRRERTTFTRAQLDVLEALFGKTRYPDIFMREEVAVKINLPESRVQVWFKNRRAKCRQQQKQHNQQQSVE-----KSSKLKNK                    | 146 |
| Nvi-1       | ATFPQGM-----NQRKRRERTTFTRAQLDVLEALFLKTRYPDIFAREVALKINLPESRVQVWFKNRRAKVRQQASQQQAQQQQ-----                            | 153 |
| Nvi-2       | G-YP-----GCNPRKRRERTTFTRAQLDVLEGLFSKTRYPDIFMREEVAVKINLPESRVQVWFKNRRAKCRQQQKQQQQQQQQ-----QQQQQQDK                    | 130 |
| Eba         | G-FSQGMW--GVNTRKRRERTTFTRAQLDVLESLFGKTRYPDIFMREEVAVKINLPESRVQVWFKNRRAKCRQQLQQQQQSNLSNSSKGNSSGNVGS--GGNSGSSRNSNSN    | 161 |
| Dme         | G-FSQGMW--GVNTRKRRERTTFTRAQLDVLEALFGKTRYPDIFMREEVAVKINLPESRVQVWFKNRRAKCRQQLQQQQQSNLSNSSKKNASGGGSGNSCSCSSSSANSRNSN   | 164 |
| Tca-1       | -----NKSASRTTTSPTKVKKASKASPAAPRSVATP-----                                                                           | 222 |
| Tca-2       | SAPILTKTSP-----TPVSIINNNTSTSSSASSPSVTAAPHLRD-----SPNY-----                                                          | 189 |
| Nvi-1       | -----QQQQQNLNEQKSAGRTQTNTQSSASAASNKQ-----                                                                           | 185 |
| Nvi-2       | SSRTSKKLQPSNPNGAVSGNPPPGKSPSIATTPATAAAATAAVPATTPLSGGTAGSAASSPALLRD-----SPQYKASAGG-----                              | 207 |
| Eba         | NNSGNANNQNSS--GSGNSGTNSSNT-----PAKSSNNNNNNNNKSSANSA-----                                                            | 206 |
| Dme         | GSSNNNTQSSGGNNSNKSSQKQNSQSSQGGSSGGNNSNNNSAAAAASAAAATAAQAQSIKTHHS--SFLSAAAAASGGTNTQSANNSNNNNQGNSTPNSSSSGGGGGSQAG     | 277 |
| Tca-1       | -----TGIPTPSTSASPPTVNI--KKE-----                                                                                    | 248 |
| Tca-2       | -----IKPOLHVSTGTSTSPETIA-----SATYTNANSNS-I-----SPQMOSY                                                              | 219 |
| Nvi-1       | -QLNAAAANN-SLQAIARRTSPCSPRPAKAPGNSPLV-----STTPSVASSSSNNNPVAAGYPRLGATPGA I-----                                      | 254 |
| Nvi-2       | -----ASSLLLAASTTPPSQLG-----GTVYSSGGSSSI-----                                                                        | 238 |
| Eba         | -----                                                                                                               | 206 |
| Dme         | GHLSAAAAAALNVTAHQNSPLLP-TPATSVSPVS-IVCKKEHLGGYSSVGGGGGGGASSGGLNLG-VGVGVGVGVGVGSQDLLRSPYDQLKDAGGDIGAGVHHHSIY         | 389 |
| Tca-1       | RP-----TGNITPHGSNTSSLIITPSPSAPLA-----YOHEYNSFN-WTANGHGHTSSHNYAQNYY--APTYYGQM                                        | 313 |
| Tca-2       | ---WSPASIDS---FTLEQHR---SWCSSSQVPLSTTN-----STTNCY-----NN---YP-----RYSNM                                             | 262 |
| Nvi-1       | -----SNASSTVITPSPPTS-----DY-----HSF I---CIVSRYC--                                                                   | 284 |
| Nvi-2       | ---WSPAVTESGAAGNGAGAAGFPGSEHQRLAAW---ATTS---SQOQCY-----QN---YS---SYYSNM                                             | 288 |
| Eba         | -----PVTMPSPQSAAVAHAAAAQAQAQSAHHSAA-AHSAYMNSHDSYNFVHWN-QY-NQ-----YPNNY-QTPSYYSQM                                    | 270 |
| Dme         | GSAAGSNPRLLPQG-----GNITPMDSSSS-I-TTPSPPIITPMSQSAAAA--AHAAQAQAQSAHHSAA-HSAAYMNSHDSYNFVHWN-QY-QQ-----YPNNYAQAQPSYYSQM | 484 |
| Tca-1       | QPDYILNSQTTQ--HMQAMNMMAGT-YQMTGYSAMGMAAPHHQNFQ-----PRHPDCS-----MEFANMA                                              | 371 |
| Tca-2       | --DYLS--STMSHQFG-----NGLTSGWKSRSDES--SWF-YNS-GW-E-----RK                                                            | 301 |
| Nvi-1       | -----YTLFSQVFPVRECRERERESKTKKLRKRR-----TATALARIMIIYIHSYIAL                                                          | 335 |
| Nvi-2       | --DYLSPTSHQLNVVVGTRSSASSCFSESQGA-----NGLDNAWPRTRDESASSWF-YNSAGWGE-----RK                                            | 348 |
| Eba         | --EYFSNQ--QVNYNMG-HSGYSASNFLSPSSFTGTMSA-QAFSONGLDYMSPODK-----YVNMV                                                  | 328 |
| Dme         | --EYFSNQ--QVNYNMG-HSGYTASNFLSPSPFTGTVSA-QAFSONSLIYMSPODK-----YANMV                                                  | 542 |
