# Supplementary material for: Evidence for a composite anterior determinant in the hover flyEpisyrphus balteatus(Syrphidae), a cyclorrhaphan fly with an anterodorsal serosa anlage
Source: Oxford University Press journal article supplement (doi:10.1242/dev.030270), 2008-12-07
Supplement: dev030270-sup-030270-tables1.pdf [file dev030270-sup-030270-tables1.pdf]

**Table S1. Templates and products of rapid amplification of cDNA ends (RACEs)**

| <i>Episyrphus</i> homologue | Template*                                      | Primer pair <sup>†</sup>                                                                                                                                                                                   | GenBank <sup>‡</sup> |
|-----------------------------|------------------------------------------------|------------------------------------------------------------------------------------------------------------------------------------------------------------------------------------------------------------|----------------------|
| <i>Eba-hb</i> (P1)          | SMART 5' & 3' cDNA (e: 0-5 hours)              | GATACACCGACGAGTGTGACTTCC/10xUPM<br>ne: AGCCCTGGTGGAGTAAGTGGATTA/NUP<br>GGGAATATTAATTCTGTAAACGGAGA/<br>AGTATGTACAATTTTGGACAACAGTATTTT<br>GCACAAGAATTTAAAGCCATTCCA/10xUPM<br>ne: CTATGTTGAACTCCCACCGGAAG/NUP | FJ387229             |
| <i>Eba-hb</i> (P2)          | SMART 5' cDNA (e: 0-5 hours)                   | GATACACCGACGAGTGTGACTTCC/10xUPM<br>ne: AGCCCTGGTGGAGTAAGTGGATTA/NUP                                                                                                                                        | FJ387228             |
| <i>Eba-hb</i> (P3)          | SMART 5' cDNA (e: 0-5 hours)                   | CCGACGAGTGTGACTTCCGGTGGGAGTTCAAC/UPM<br>ne: GATACACCGACGAGTGTGACTTCC/NUP                                                                                                                                   | FJ387227             |
| <i>Eba-nos</i>              | SMART 5' & 3' cDNA (e: 0-6 hours)              | ACCGTATGTGCGTTATCACCAGTC/10xUPM<br>ne: CGCTTTGCAGATCGGACAGATGTA/NUP<br>CTGTTGTCAAGAGCCATAATGTCCG/10xUPM<br>ne: TGTCCTGACATACACGACAAGGT/NUP                                                                 | FJ387226             |
| <i>Eba-cad</i>              | SMART 5' (e: 0-5 hours) &<br>Marathon cDNA (a) | GGATGGTTATGTAGCGGGAGGTG/10xUPM<br>GCACCTCCCGCTACATAACCATCC/AP1                                                                                                                                             | FJ387230             |
| <i>Eba-otd</i>              | SMART 5' & 3' cDNA (e: 0-5 hours)              | CATCTAATTGCGCTCGTGTGAATG/10xUPM<br>CATTACACGAGCGCAATTAGATG/10xUPM                                                                                                                                          | FJ387225             |

\*Origin of the tissue for mRNA isolation: adult females (a) and embryos (e). Age of embryos in hours at 25°C.

<sup>†</sup>Primer sequences in 5'-3' direction. ne, nested RACE; AP1/AP2, adaptor primers of Marathon Kit; 10xUPM/NUP, adaptor primers of SMART RACE Kit.

<sup>‡</sup>GenBank Accession Number.
