# Supplementary figures and images for: Evidence for a composite anterior determinant in the hover flyEpisyrphus balteatus(Syrphidae), a cyclorrhaphan fly with an anterodorsal serosa anlage
Source: Oxford University Press journal article supplement (doi:10.1242/dev.030270), 2008-12-07

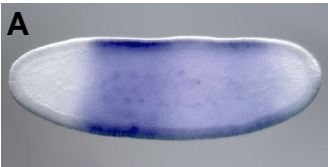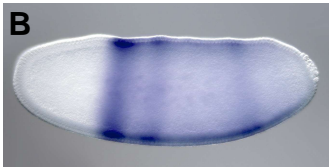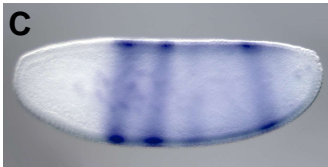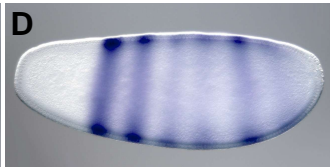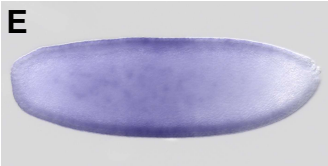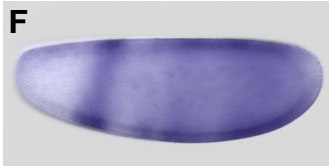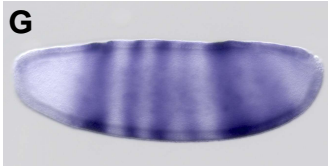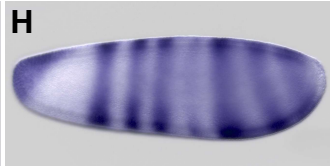

Supplement: dev030270-sup-030270-figs1.pdf [file dev030270-sup-030270-figs1.pdf]

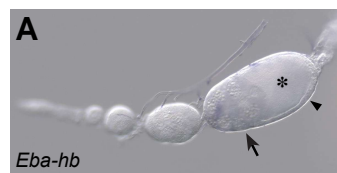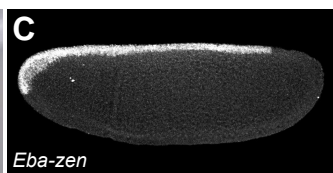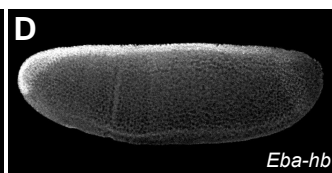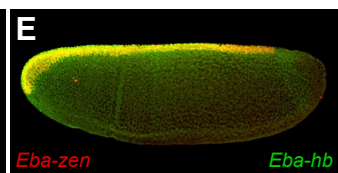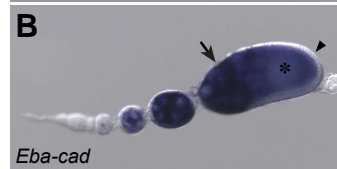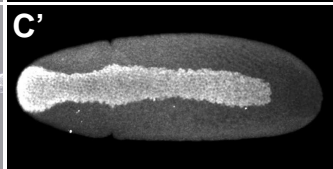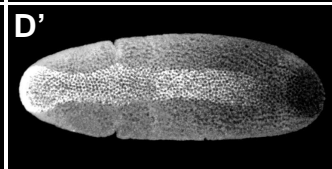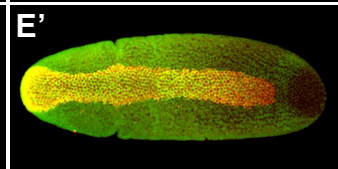

Supplement: dev030270-sup-030270-figs4.pdf [file dev030270-sup-030270-figs4.pdf]

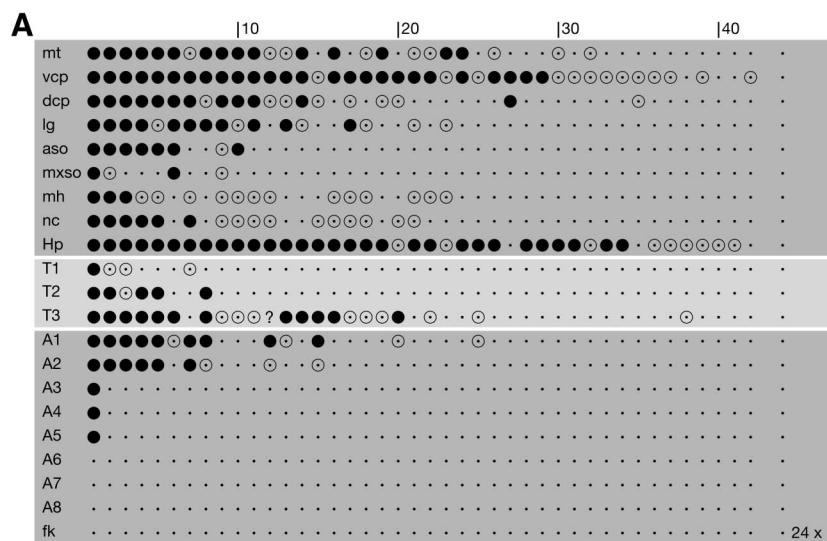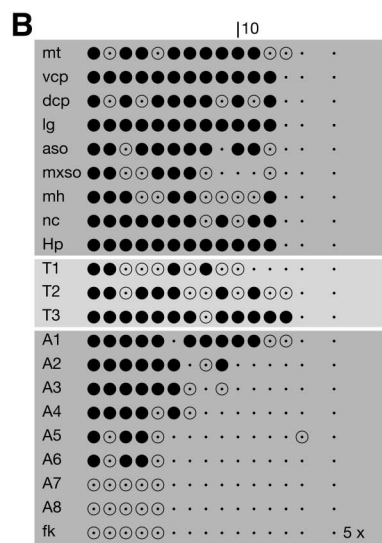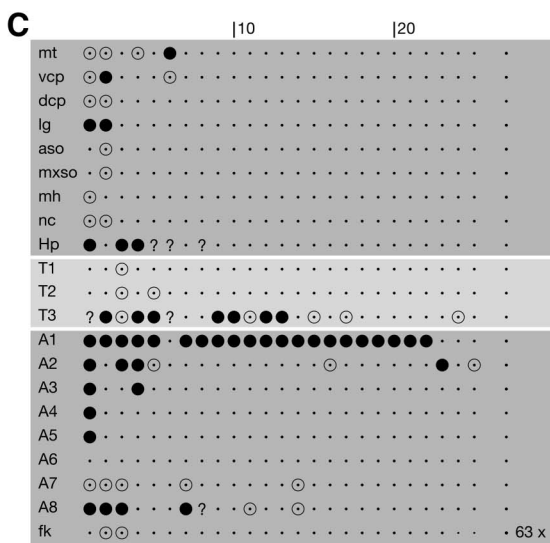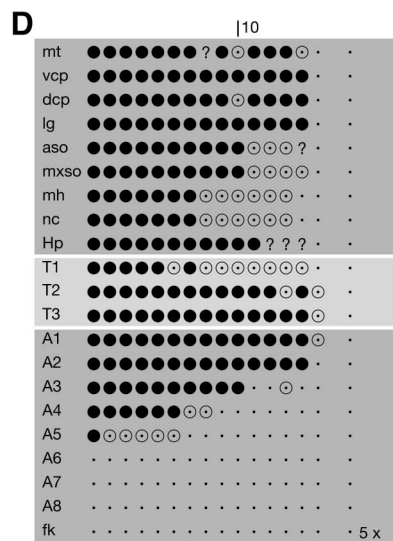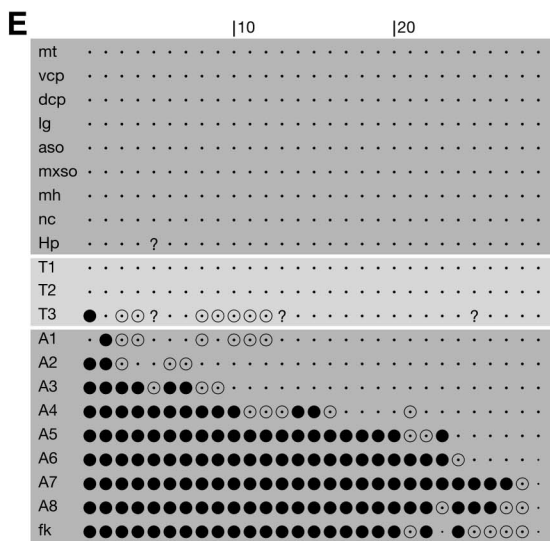

Supplement: dev030270-sup-030270-figs5.pdf [file dev030270-sup-030270-figs5.pdf]
